# Supplementary material
Source: publisher figshare collection journal article supplement (https://gsajournals.figshare.com/ndownloader/files/15381116)
Supplement: Supplementary file 1 [file 15381116]

**Table S6. Counts of antisense transcripts overlapping with various transcript classes.**

| Input: Downregulated Antisense Transcripts (n=256) | | | | | | | |
| --- | --- | --- | --- | --- | --- | --- | --- |
|  | SRAT | CUT | SUT | NUT | XUT | snoRNA | Count |
| cluster 1 | 4 | 14 | 11 | 28 | 32 | 0 | 43 |
| cluster 2 | 11 | 9 | 11 | 36 | 18 | 0 | 86 |
| cluster 3 | 10 | 41 | 36 | 72 | 77 | 0 | 103 |
| cluster 4 | 4 | 8 | 11 | 31 | 24 | 0 | 65 |
| cluster 5 | 4 | 33 | 13 | 37 | 30 | 0 | 50 |
| sum | 33 | 105 | 82 | 204 | 181 | 0 | 347 |
|  |  |  |  |  |  |  |  |
| Input: Upregulated Antisense Transcripts (n=353) | | | | | | | |
|  | SRAT | CUT | SUT | NUT | XUT | snoRNA | Count |
| cluster 1 | 25 | 6 | 2 | 19 | 14 | 0 | 94 |
| cluster 2 | 35 | 10 | 13 | 21 | 33 | 0 | 84 |
| cluster 3 | 20 | 12 | 12 | 31 | 21 | 0 | 95 |
| cluster 4 | 44 | 2 | 9 | 16 | 21 | 0 | 110 |
| cluster 5 | 15 | 8 | 7 | 16 | 36 | 0 | 75 |
| sum | 139 | 38 | 43 | 103 | 125 | 0 | 458 |

Data shown here are graphed in Figure S3D and S3E. Note that the total count of antisense regions captured when calculating overlap between antisense transcripts and previously published annotations is larger than the number of antisense transcripts used in the analysis. This is due to a single antisense transcript overlapping with more than one previously annotated transcript.
